# Supplementary figures and images for: Selection of Appropriate Reference Genes for Gene Expression Analysis under Abiotic Stresses in Salix viminalis
Source: MDPI journal article supplement (doi:10.3390/ijms20174210), 2019-08-28

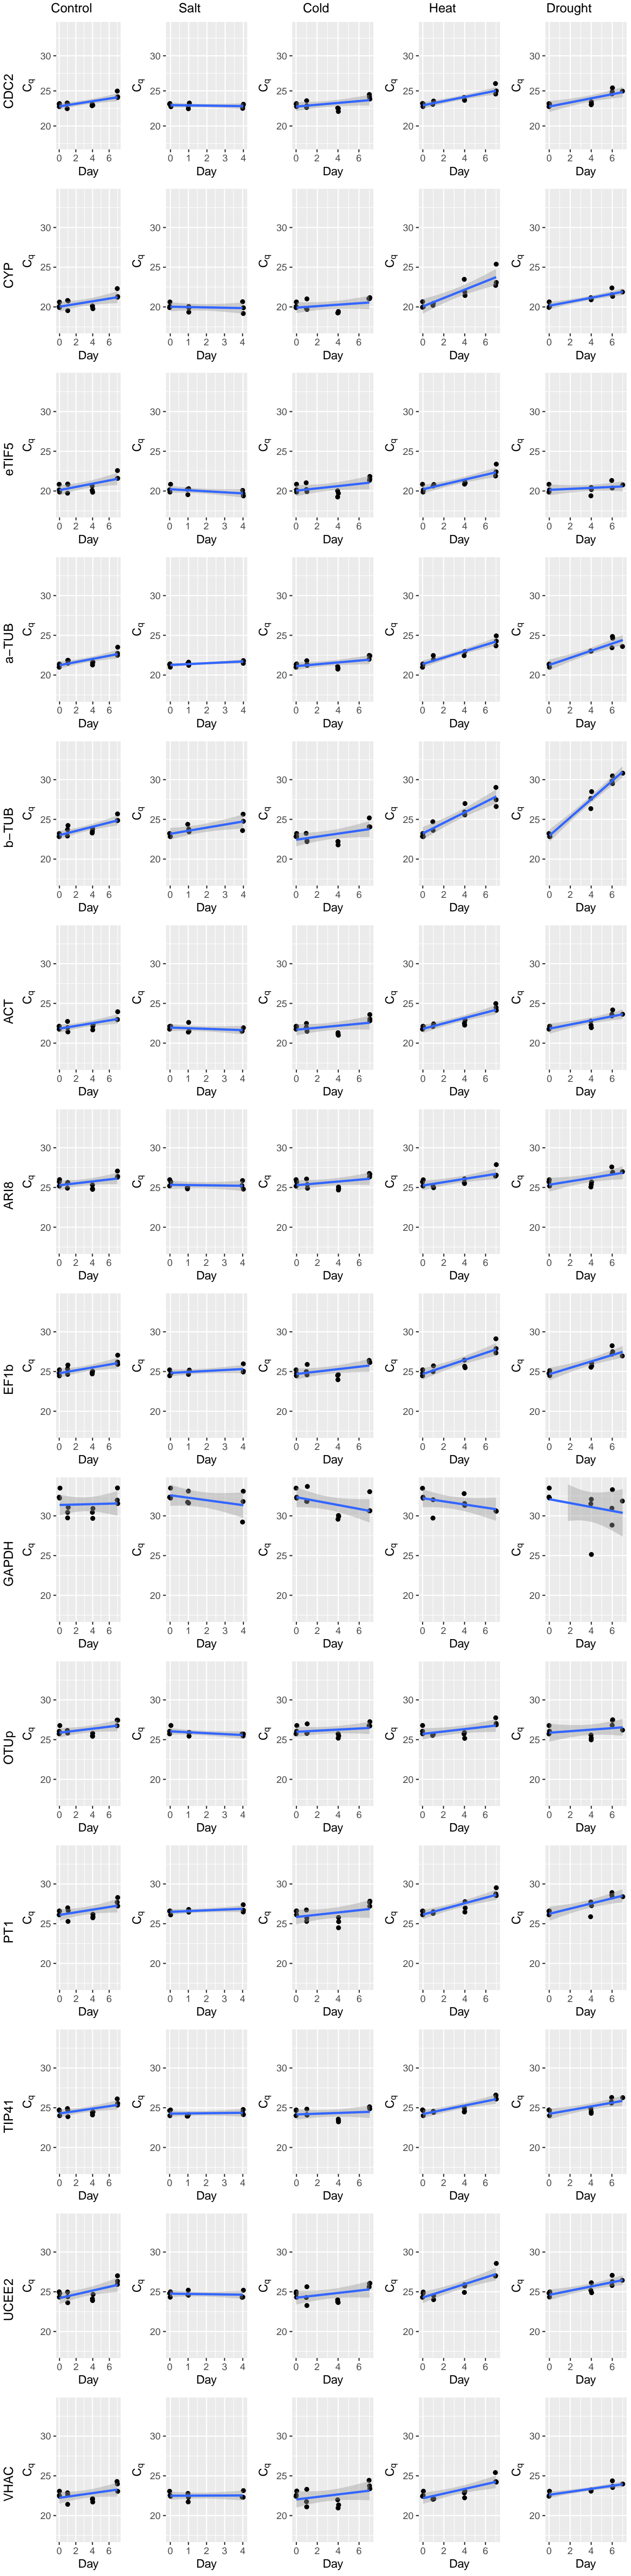

Supplement: s1 [file s1]

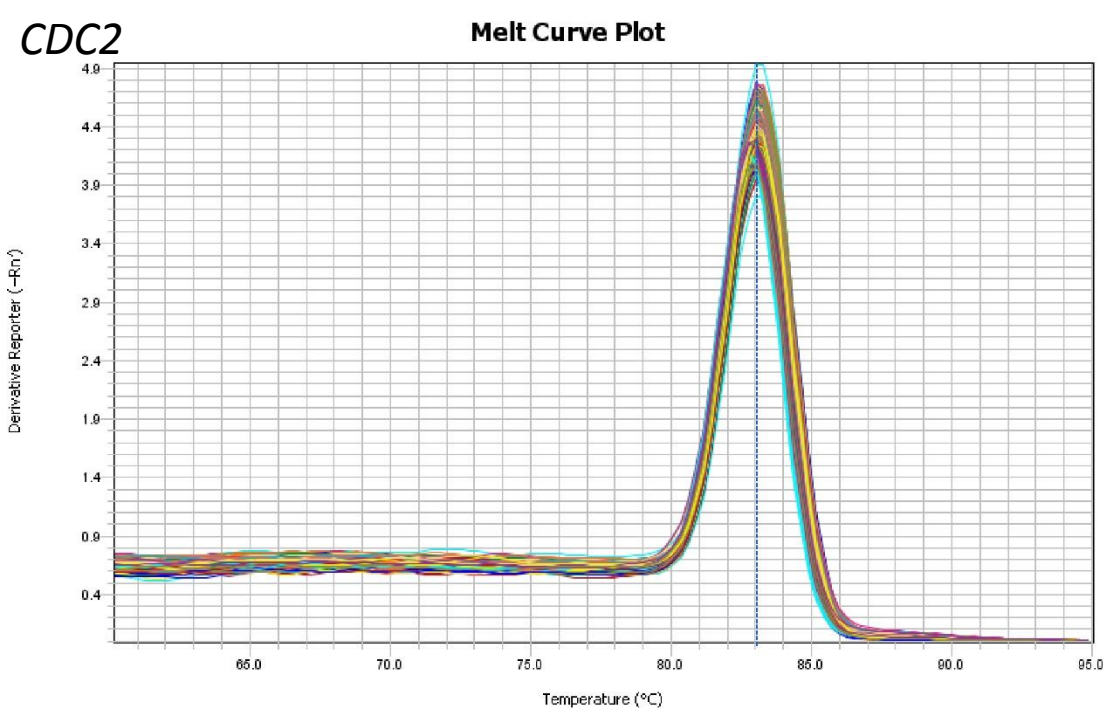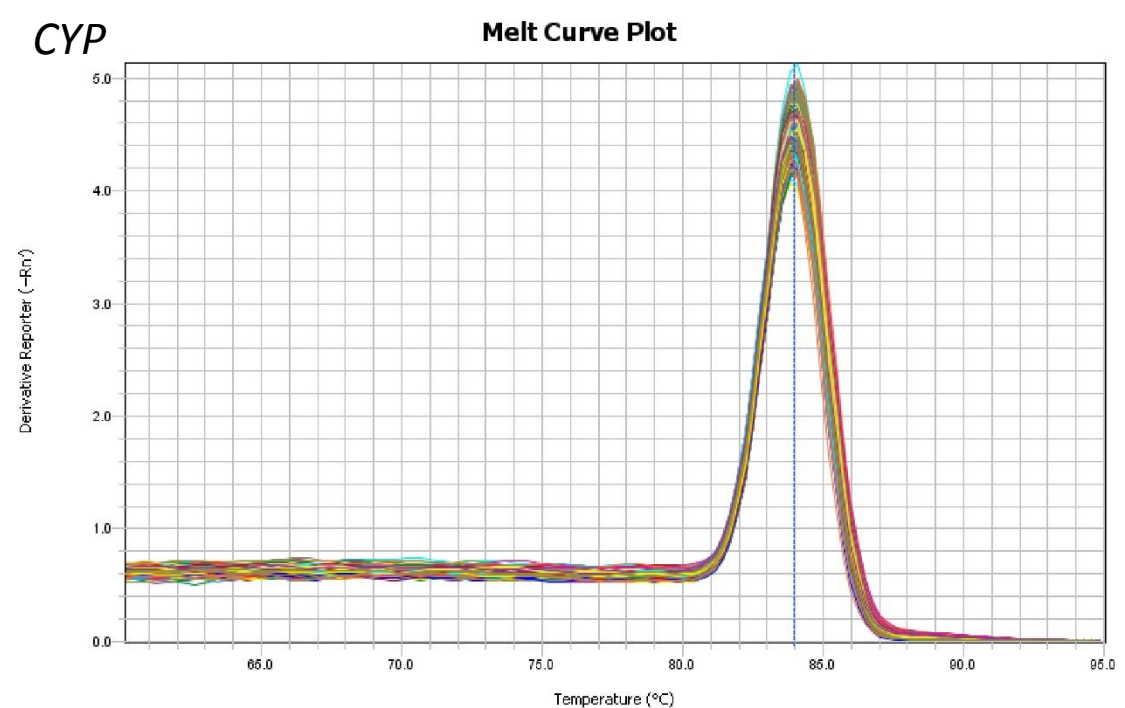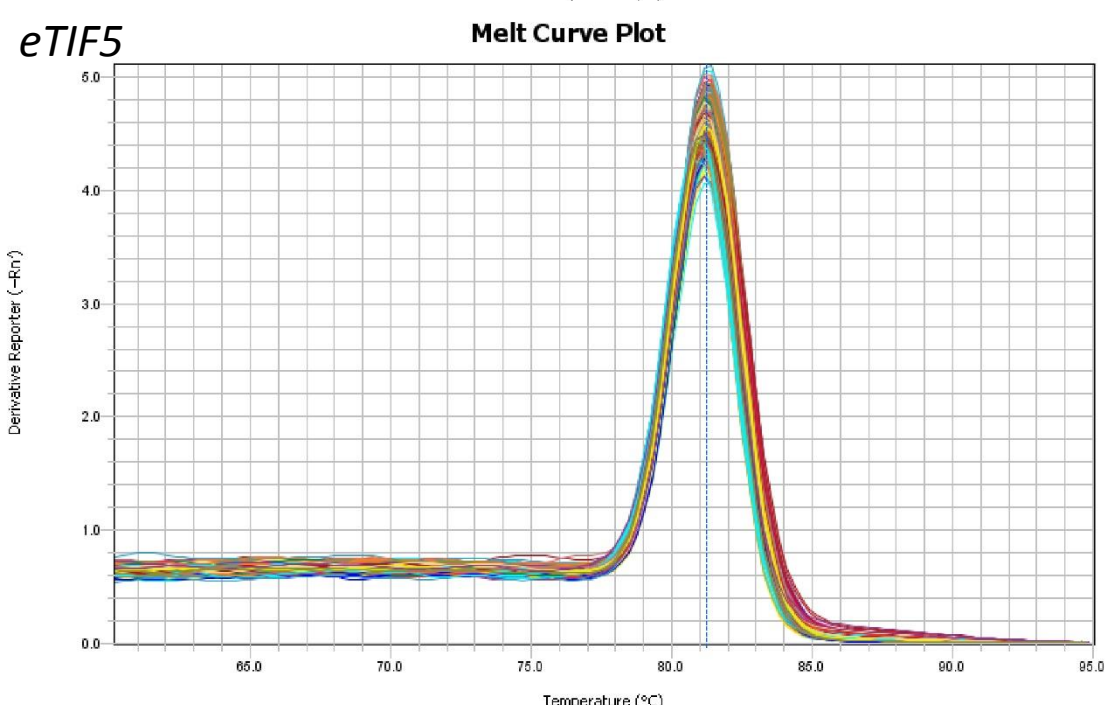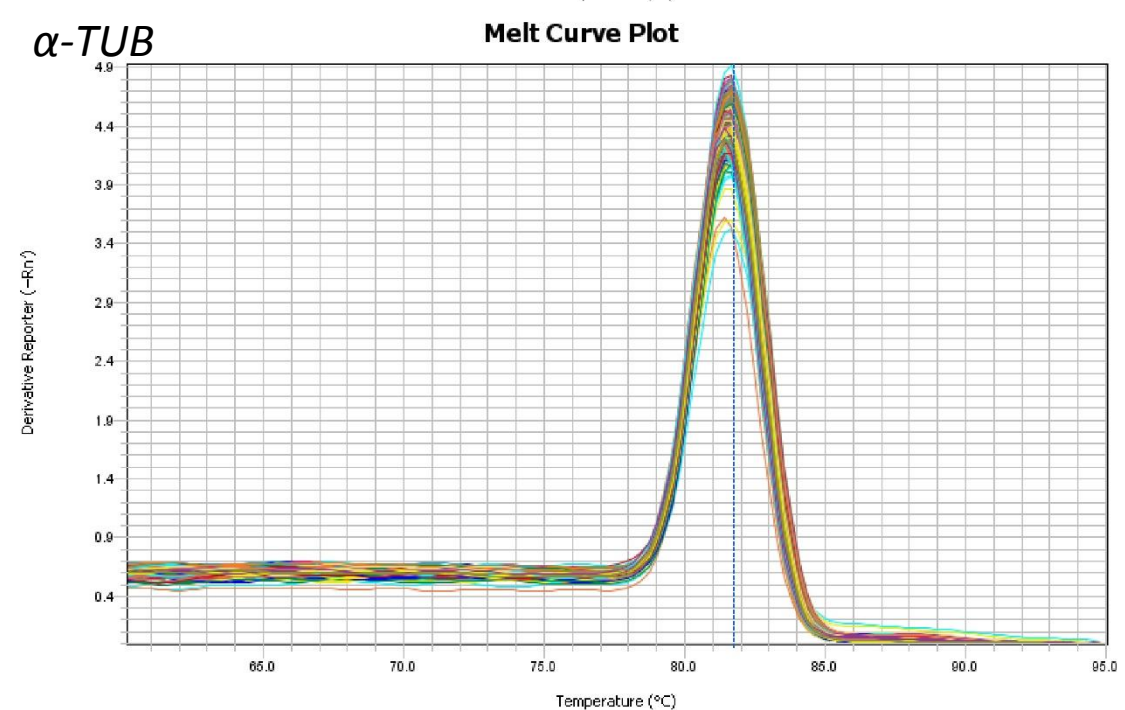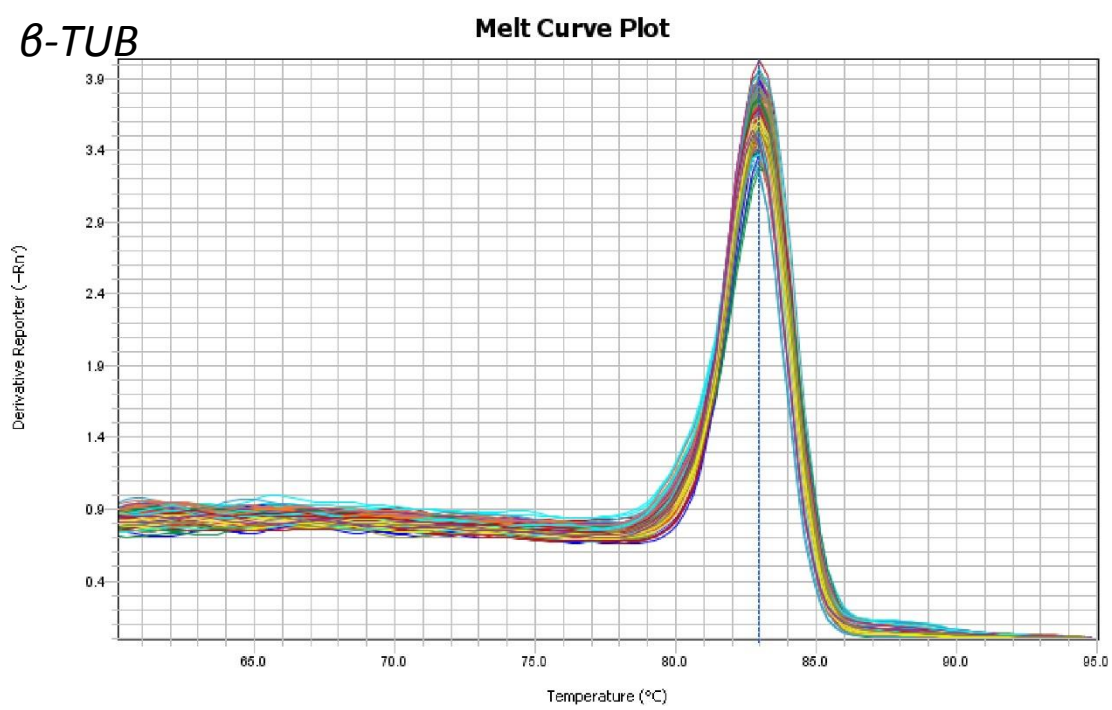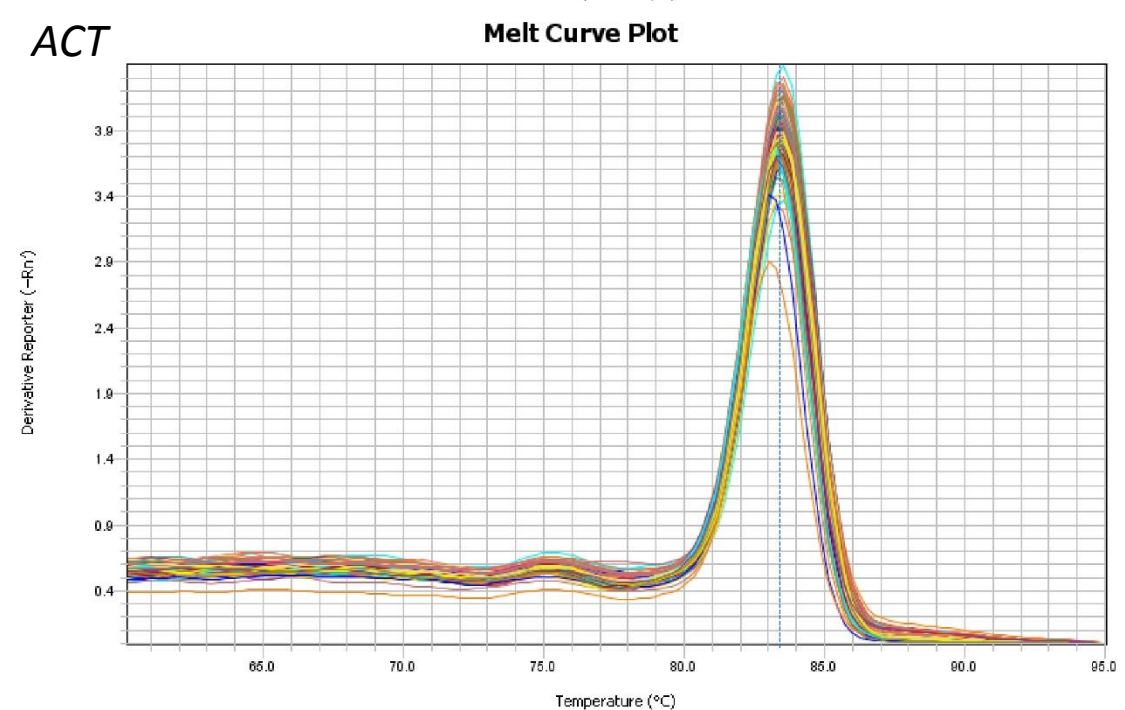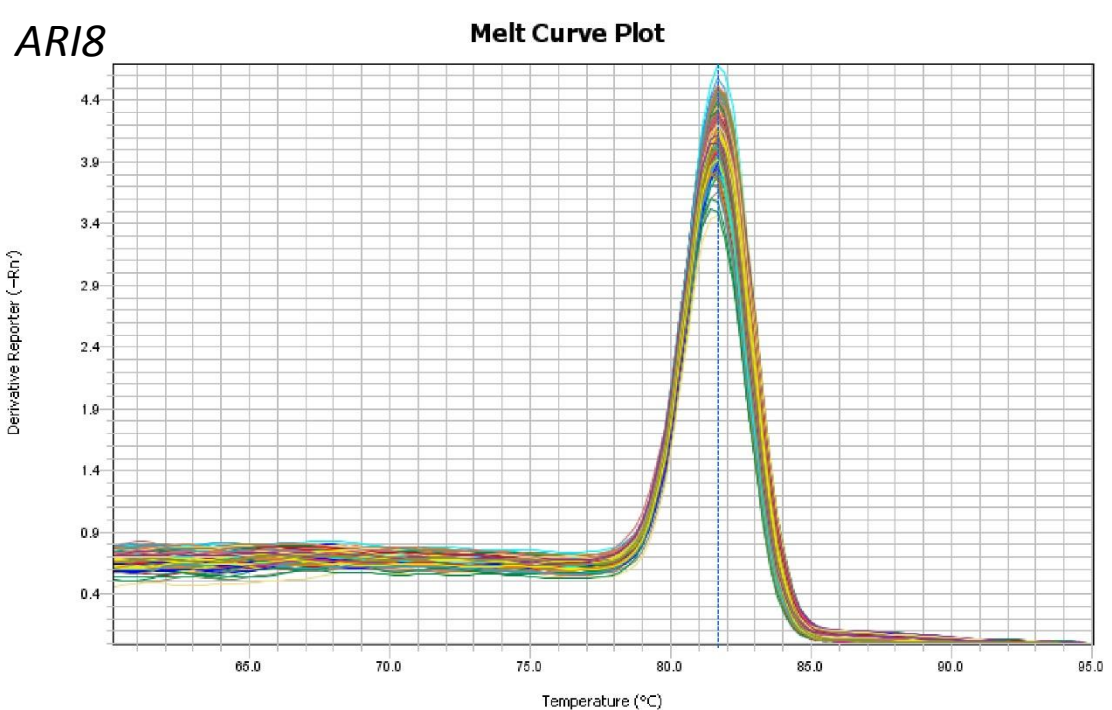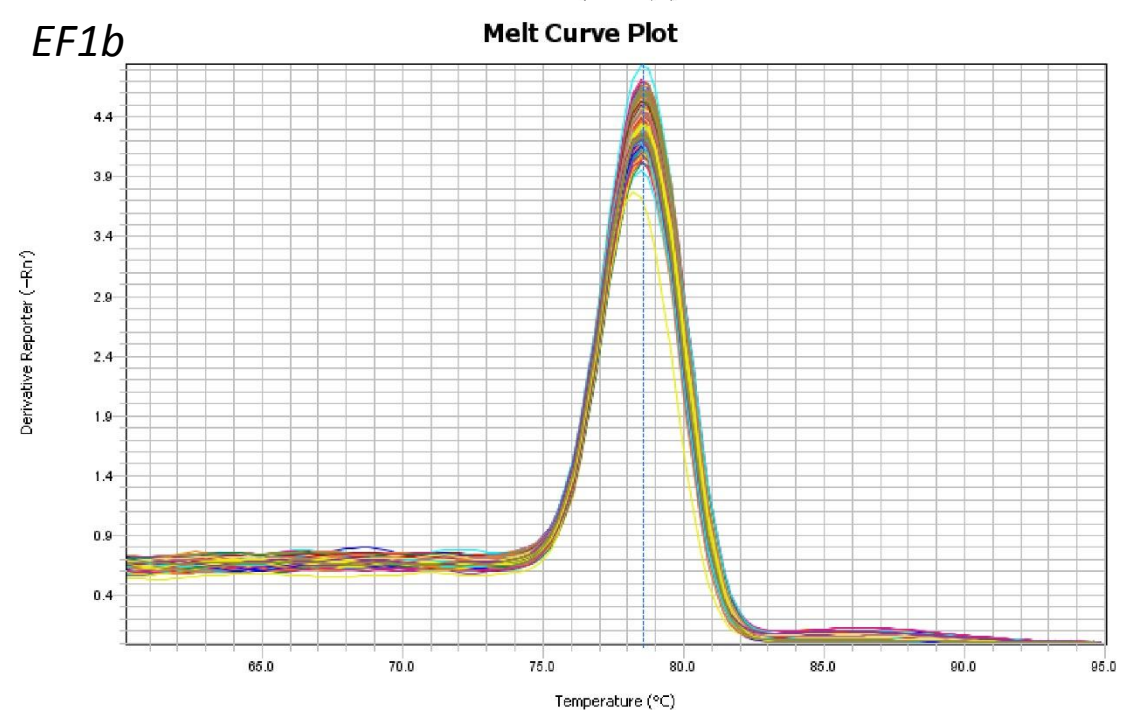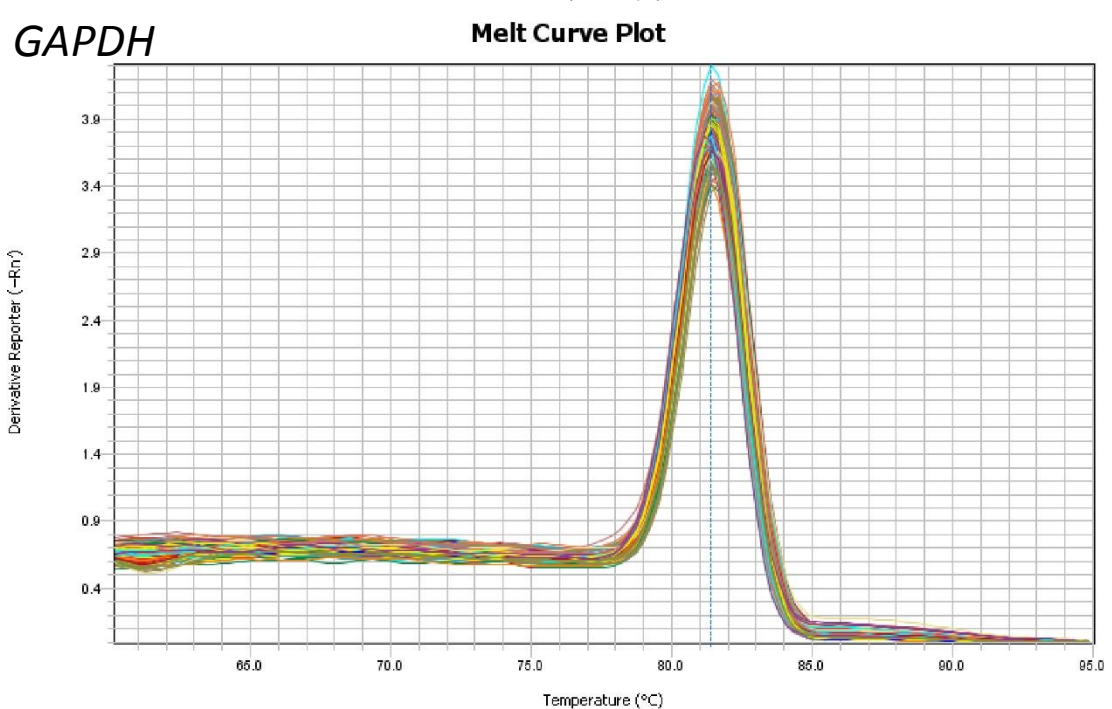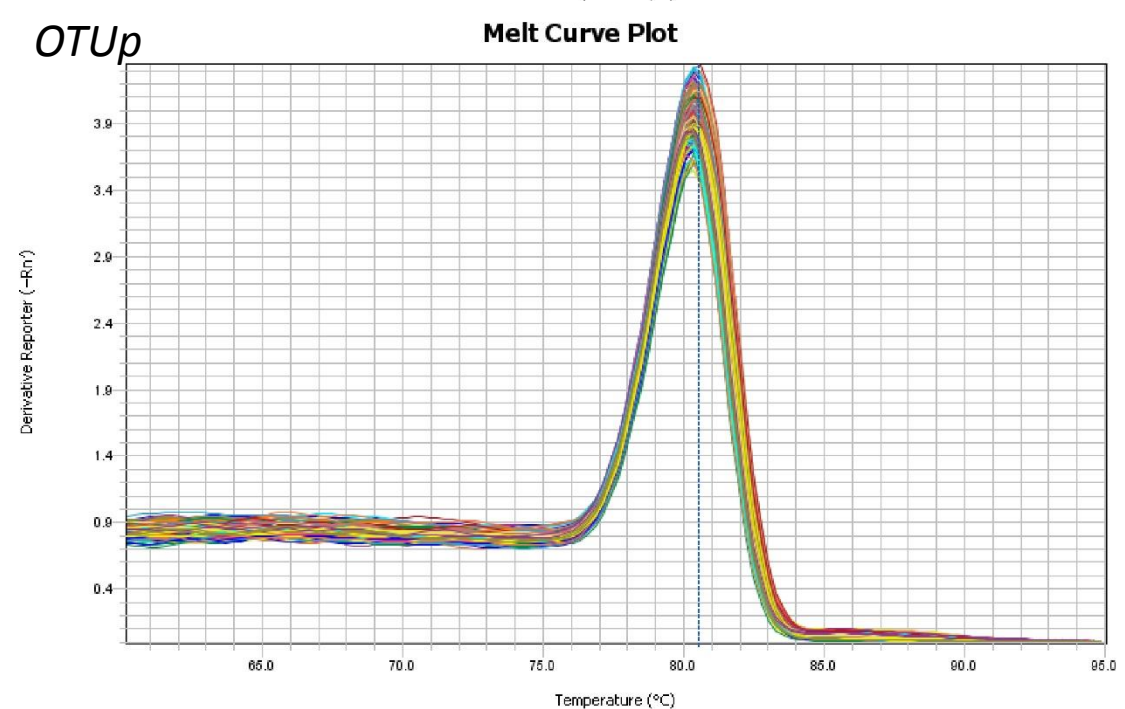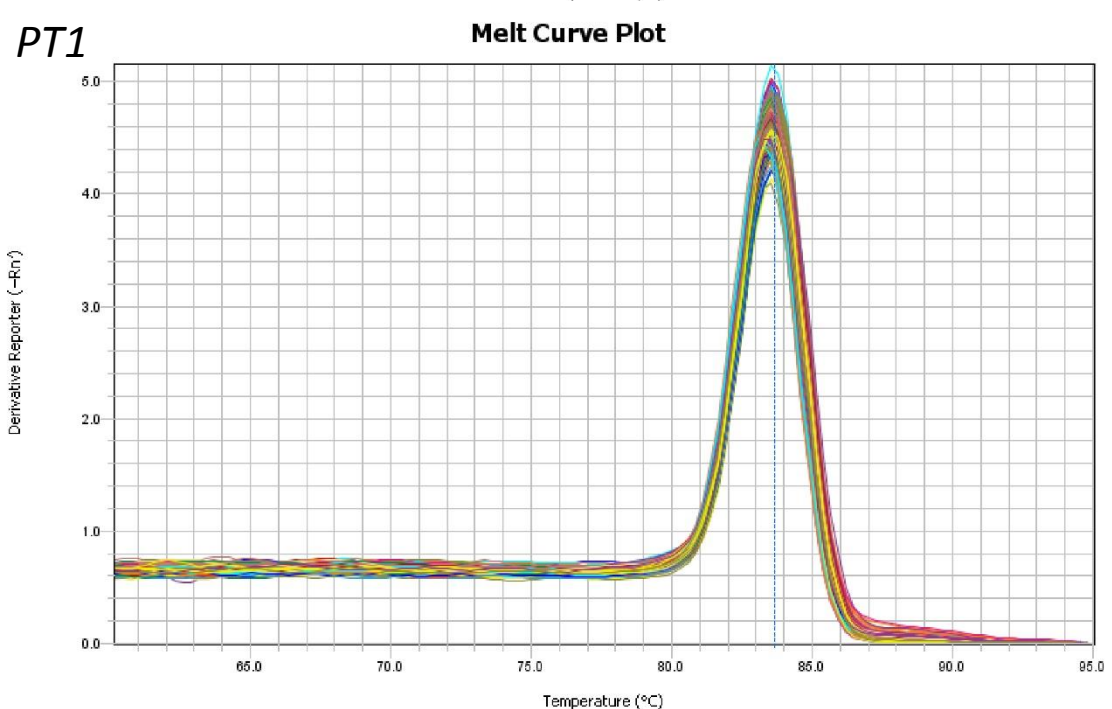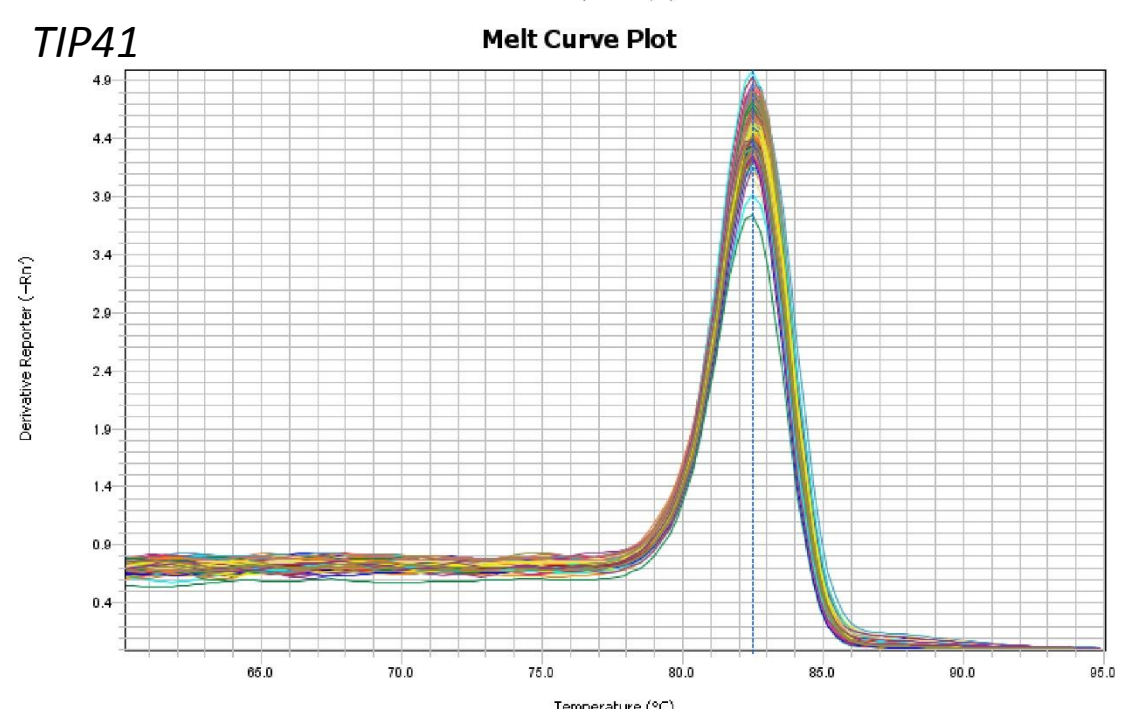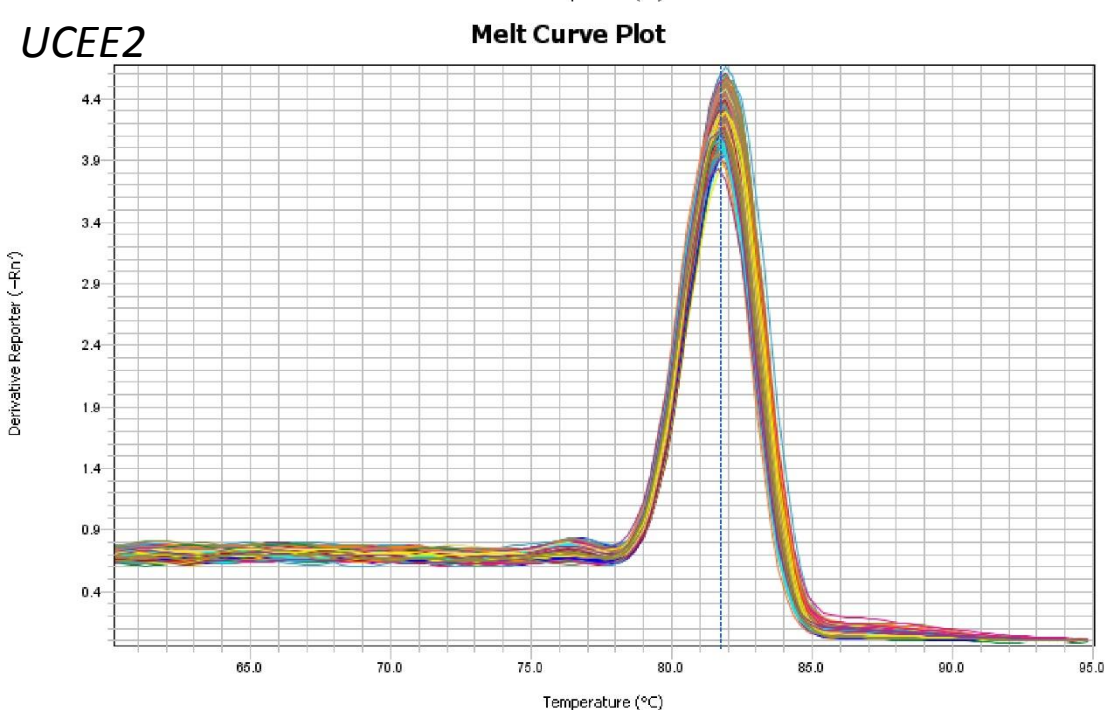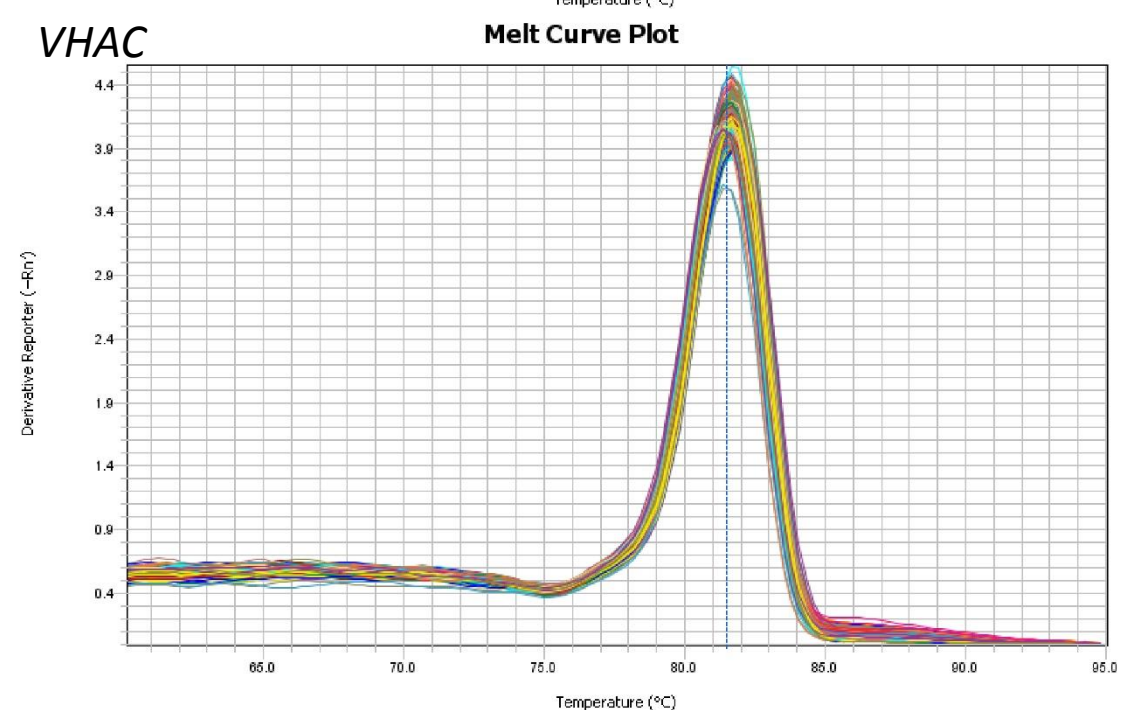

Supplement: s1 [file s1]

ADC

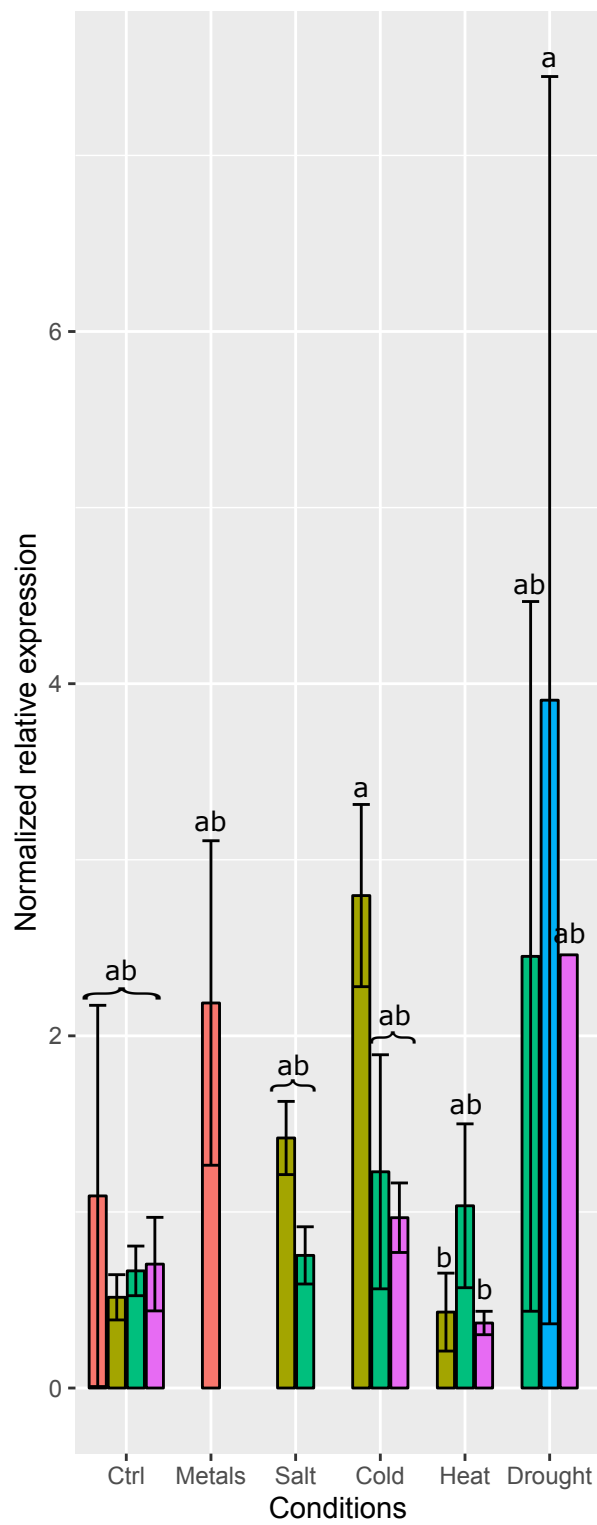

CAT

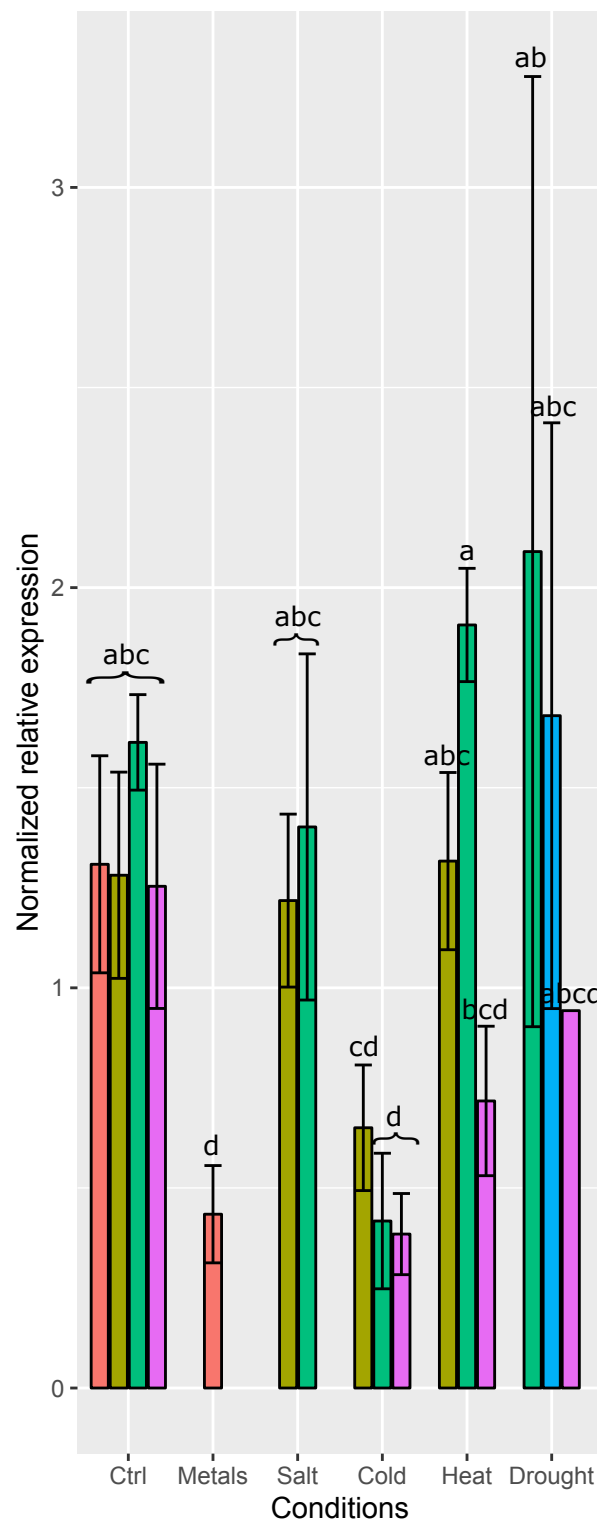

HSP17

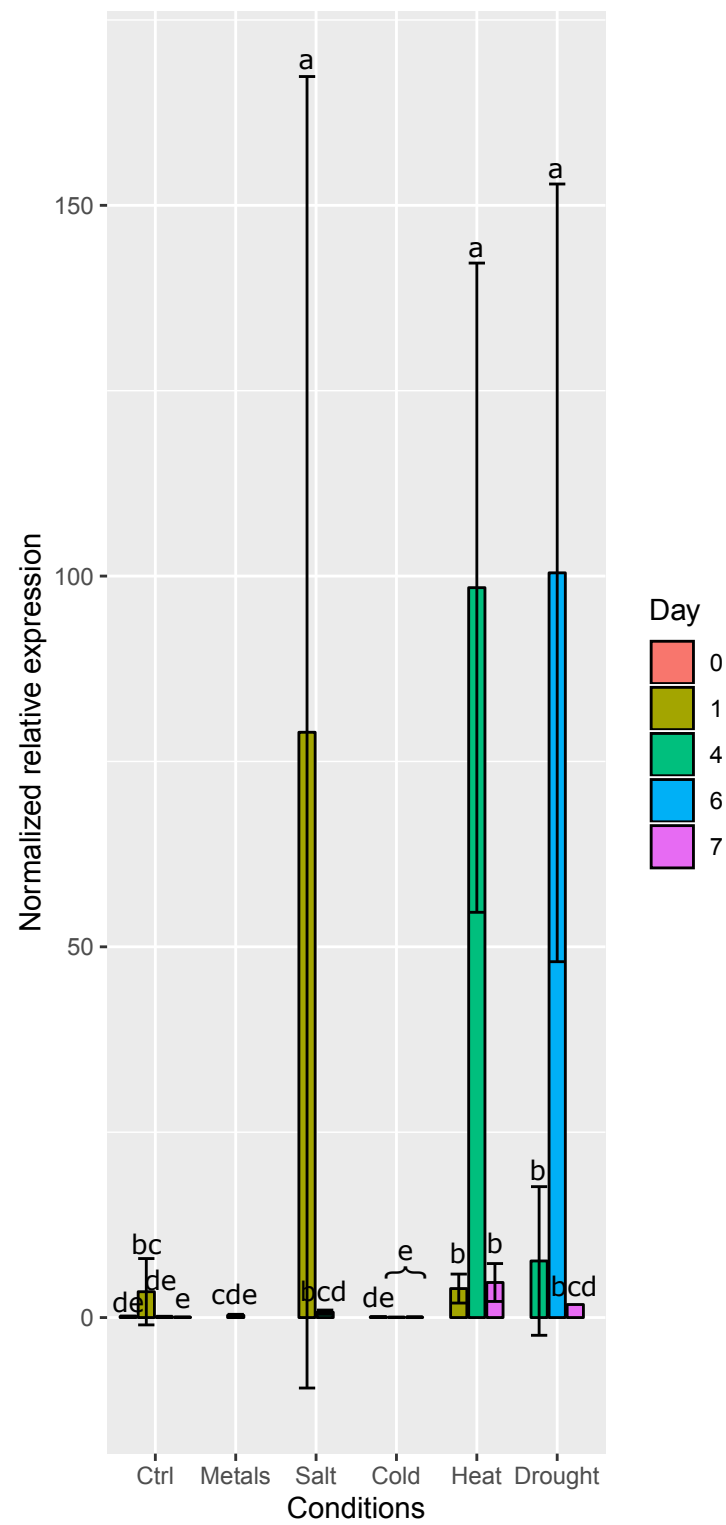

Supplement: s1 [file s1]

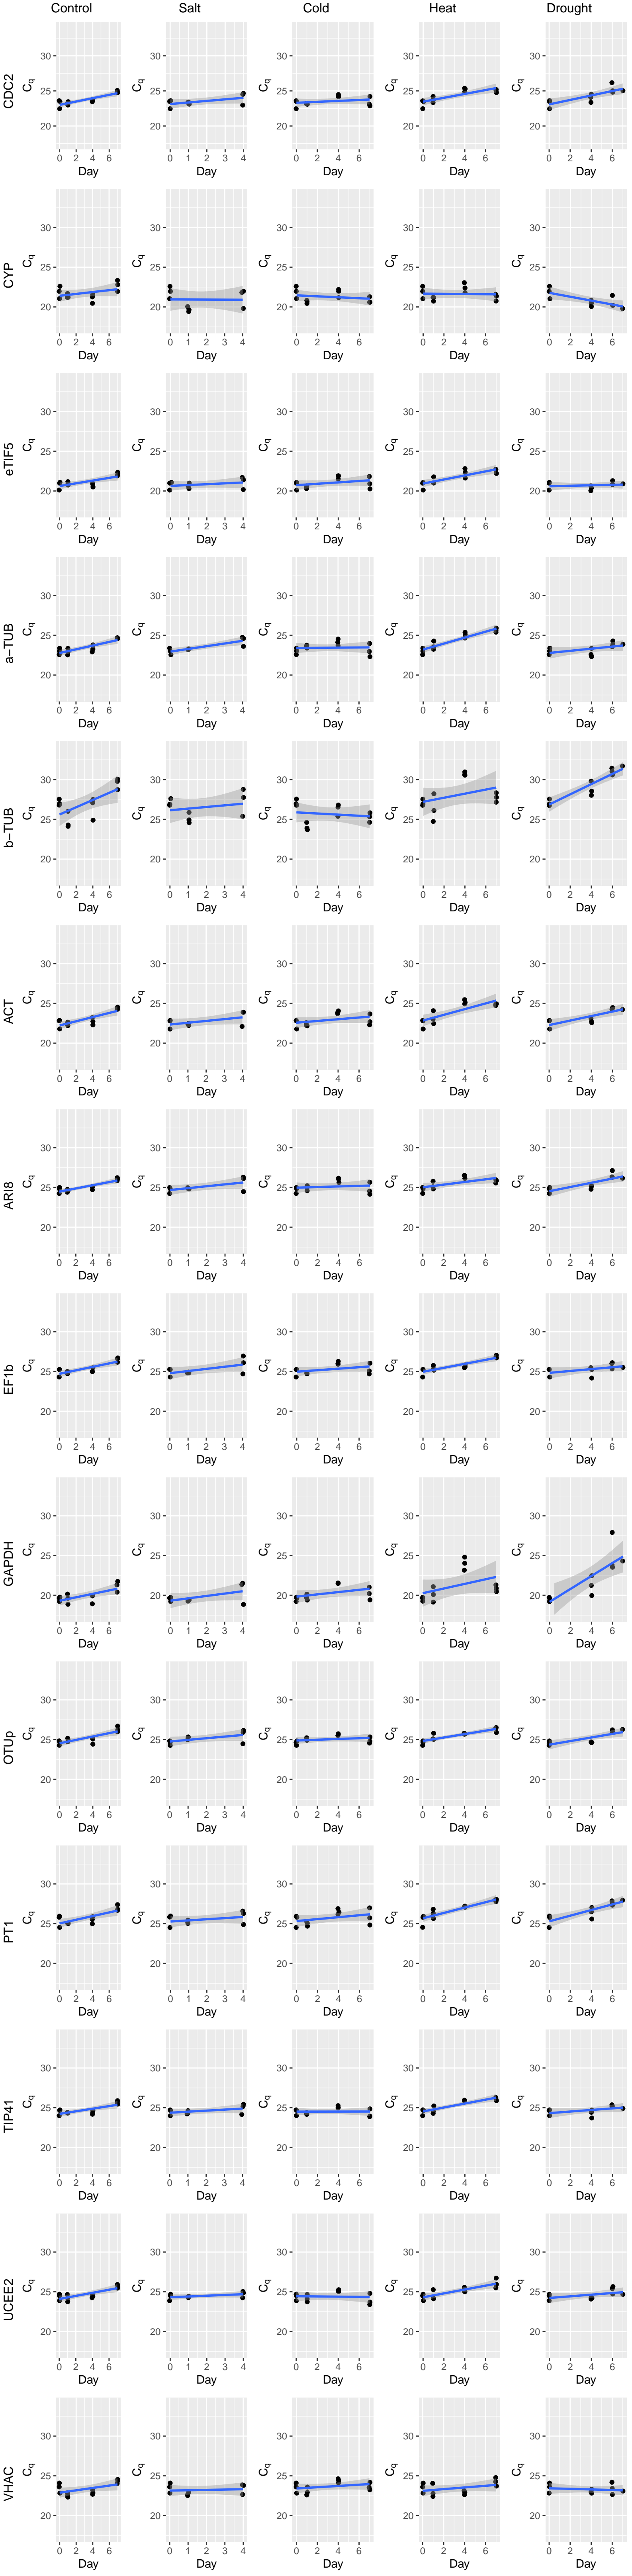

Supplement: s1 [file s1]
